1 **Comprehensive analysis of horizontal gene transfer among multidrug-resistant bacterial**  
2 **pathogens in a single hospital**

3

4 Daniel R. Evans<sup>1,2</sup>, Marissa P. Griffith<sup>3</sup>, Mustapha M. Mustapha<sup>3</sup>, Jane W. Marsh<sup>3</sup>, Alexander J.  
5 Sundermann<sup>3</sup>, Vaughn S. Cooper<sup>4</sup>, Lee H. Harrison<sup>3</sup>, Daria Van Tyne<sup>1</sup>

6

7 <sup>1</sup>Division of Infectious Diseases, University of Pittsburgh School of Medicine

8 <sup>2</sup>Department of Infectious Diseases and Microbiology, University of Pittsburgh Graduate School  
9 of Public Health

10 <sup>3</sup>Microbial Genomic Epidemiology Laboratory, Infectious Diseases Epidemiology Research Unit,  
11 University of Pittsburgh School of Medicine and Graduate School of Public Health

12 <sup>4</sup>Department of Microbiology and Molecular Genetics, and Center for Evolutionary Biology and  
13 Medicine, University of Pittsburgh

14

15 **ABSTRACT**

16 Multidrug-resistant bacterial pathogens pose a serious public health threat, especially in hospital  
17 settings. Horizontal gene transfer (HGT) of mobile genetic elements (MGEs) contributes to this  
18 threat by facilitating the rapid spread of genes conferring antibiotic resistance, enhanced  
19 virulence, and environmental persistence between nosocomial pathogens. Despite recent  
20 advances in microbial genomics, studies of HGT in hospital settings remain limited in scope.  
21 The objective of this study was to identify and track the movement of MGEs within a single  
22 hospital system using unbiased methods. We screened the genomes of 2,173 bacterial isolates  
23 from healthcare-associated infections collected over an 18-month time period to identify  
24 nucleotide regions that were identical in the genomes of bacteria belonging to distinct genera.  
25 These putative MGEs were found in 196 isolates belonging to 11 different genera; they grouped  
26 into 51 clusters of related elements, and they were most often shared between related genera.

27 To resolve the genomic locations of the most prevalent MGEs, we performed long-read  
28 sequencing on a subset of representative isolates and generated highly contiguous, hybrid-  
29 assembled genomes. Many of these genomes contained plasmids and chromosomal elements  
30 encoding one or more of the MGEs we identified, which were often arranged in a mosaic  
31 fashion. We then tracked the appearance of ten MGE-bearing plasmids in all 2,173 genomes,  
32 and found evidence supporting the transfer of plasmids between patients independent from  
33 bacterial transmission. Finally, we identified two instances of likely plasmid transfer across  
34 genera within individual patients. In one instance, the plasmid appeared to have subsequently  
35 transferred to a second patient. By surveying a large number of bacterial genomes sampled  
36 from infections at a single hospital in a systematic and unbiased manner, we were able to track  
37 the independent transfer of MGEs over time. This work expands our understanding of HGT in  
38 healthcare settings, and can inform efforts to limit the spread of drug-resistant pathogens in  
39 hospitals.

40

## 41 **INTRODUCTION**

42 Horizontal gene transfer (HGT) is a driving force behind the multidrug-resistance and  
43 heightened virulence of healthcare-associated bacterial infections<sup>1</sup>. Genes conferring antibiotic  
44 resistance, heightened virulence, and environmental persistence are often encoded on mobile  
45 genetic elements (MGEs), which can be readily shared between bacterial pathogens via HGT<sup>2</sup>.  
46 While rates of HGT are not well quantified in clinical settings, prior studies have shown that  
47 MGEs can mediate and/or exacerbate nosocomial outbreaks<sup>3-6</sup>. Recent studies have also  
48 demonstrated that multidrug-resistant healthcare-associated bacteria share MGEs across large  
49 phylogenetic distances<sup>7-9</sup>. Understanding the dynamics of MGE transfer in clinical settings can  
50 uncover important epidemiologic links that are not currently identified by traditional infection  
51 control methodologies<sup>1,10,11</sup>.

52

53 Methods to identify and track the movement of MGEs among bacterial populations on short  
54 timescales are limited. Bacterial whole-genome sequencing has transformed infectious disease  
55 epidemiology over the last decade<sup>12</sup>, providing powerful new tools to identify and intervene  
56 against outbreaks<sup>13</sup>. Despite these advances, efforts to track MGE movement have focused  
57 almost exclusively on drug resistance and virulence genes<sup>5,7,11,14</sup>, often ignoring the broader  
58 genomic context of the mobile elements themselves. Many studies rely on the identification of  
59 plasmid replicons, transposases, and other “marker genes”,<sup>15</sup> an approach that oversimplifies  
60 the diversity of MGEs and may lead to incomplete or erroneous conclusions about their  
61 epidemiology. While querying databases containing curated MGE-associated sequences is  
62 useful for the rapid screening of clinical isolates for known MGEs, it will not capture novel  
63 MGEs. Additionally, whole-genome sequencing using short-read technologies generates  
64 genome assemblies that usually do not resolve MGE sequences, due to the abundance of  
65 repetitive elements that MGEs often contain<sup>16</sup>. Advances in long-read sequencing can mitigate  
66 this problem; the combination of short- and long-read sequence data can allow the genomic  
67 context of chromosomal and extrachromosomal MGEs to be precisely visualized<sup>7,17,18</sup>. Finally,  
68 studying the epidemiology of MGEs in clinical settings requires detailed individual-level patient  
69 clinical data, without which HGT occurrence in the hospital cannot be identified<sup>18</sup>.

70

71 Here we performed an alignment-based screen for MGEs in a large and diverse collection of  
72 bacterial genomes sampled from infections within a single hospital over an 18-month time  
73 period. We identified complete and fragmented MGEs that were identical in nucleotide  
74 sequence and occurred in the genomes of bacteria belonging to different genera. Because they  
75 are identical, we suspect that these MGEs have recently transferred between bacteria within the  
76 hospital setting. Further analysis using long-read sequencing and referenced-based resolution  
77 of distinct MGEs enabled us to precisely characterize MGE architecture and cargo, and to track  
78 MGE occurrence over time. Cross-referencing our results with available patient metadata

79 allowed us to follow these elements as they emerged and were maintained among nosocomial  
80 bacterial populations.

81

## 82 **RESULTS**

### 83 **Identification of MGEs shared across bacterial genera in a single hospital**

84 Our experimental workflow is depicted in Fig. 1A. To identify genetic material being shared  
85 between distantly related bacteria in the hospital setting, we screened a dataset containing  
86 2,173 whole-genome sequences of clinical isolates of high-priority Gram-positive and Gram-  
87 negative bacteria collected from a single hospital over an 18-month period as part of the  
88 Enhanced Detection System for Hospital-Acquired Transmission (EDS-HAT) project at the  
89 University of Pittsburgh<sup>19</sup> (Methods). To have maximal contrast in our identification of MGEs, we  
90 focused on identical sequences found in the genomes of bacteria belonging to different genera.  
91 We performed an all-by-all alignment of the 2,173 genomes in the dataset using nucmer<sup>20</sup>, and  
92 filtered the results to retain alignments of at least 5kb that shared 100% identity between  
93 bacteria of different genera. The resulting sequences were extracted and clustered using  
94 Cytoscape (Fig. 1B). This approach identified putative MGE sequences in 196 genomes  
95 belonging to 11 genera, which could be grouped into 51 clusters of related MGEs. These MGE  
96 clusters ranged in size from two to 52 genomes, and comprised two, three, or four different  
97 genera (Fig. 1B). MGE sequences were found predominantly among Gram-negative  
98 *Enterobacteriaceae*, particularly *Klebsiella spp.*, *Escherichia coli*, and *Citrobacter spp.* (Fig. 1C).  
99 Annotation of clustered sequences confirmed that more than 80% of the MGE clusters encoded  
100 one or more genes involved in DNA mobilization, plasmid replication, or another mobile function  
101 presumably involved in HGT (Fig. 1D). Somewhat surprisingly, only about one-quarter of the  
102 MGE clusters contained antimicrobial resistance genes, including genes encoding resistance to  
103 aminoglycosides, antifolates, beta-lactams, macrolides, quinolones, sulphonamides, and  
104 tetracyclines (Fig. 1D, 1E). Finally, 8/51 MGE clusters encoded genes and operons whose

105 products were predicted to interact with metals, including arsenic, copper, mercury, nickel, and  
106 silver (Fig. 1D). Collectively, these results indicate that our unbiased, alignment-based method  
107 successfully identified putative MGEs, particularly in pathogens known to engage in HGT<sup>2,21</sup>.

108

109 To assess the phylogenetic distribution of the putative MGEs we identified, we constructed a  
110 core gene phylogeny of the 196 genomes encoding one or more MGE clusters using the  
111 Genome Taxonomy Database Tool Kit (GTDBTK)<sup>22</sup> (Fig. 2). MGE clusters were often found  
112 among bacteria in related genera, in particular the *Enterobacteriaceae*. We did not observe any  
113 MGEs that were present in both Gram-positive and Gram-negative isolate genomes, but we did  
114 find MGEs in the genomes of distantly related bacteria. For example, we identified an MGE  
115 carrying three aminoglycoside resistance genes that was identical in sequence between a  
116 vancomycin resistance-encoding plasmid carried by *E. faecium* and the *C. difficile* chromosome  
117 (MGE cluster C9, Fig. 3A). The *C. difficile* strain carrying this element was previously found to  
118 also harbor an *npmA* aminoglycoside resistance gene<sup>23</sup>. We also found portions of an  
119 integrative conjugative element that were identical between two *P. aeruginosa* isolates and a *S.*  
120 *marcescens* isolate (MGE cluster C30, Fig. 3B). Identical regions of this element included  
121 formaldehyde resistance genes and Uvr endonucleases. Finally, we detected complete and  
122 identical Tn7 transposons in the genomes of *A. baumannii*, *E. coli*, and *P. mirabilis* isolates  
123 (MGE cluster C17, Fig. 3C). The Tn7 sequence we detected was also identical to the Tn7  
124 sequence of pR721, an *E. coli* plasmid that was first described in 1990 and was sequenced in  
125 2014<sup>24</sup>. Taken together, these results indicate that while many of the sequences we identified  
126 were from MGEs shared between related bacterial genera, our approach also identified partial  
127 or complete MGEs that were identical in the genomes of distantly related pathogens.

128

129 **MGEs often reside on larger elements in different combinations and contexts**

130 To further investigate the genomic context of the MGEs identified, we selected representative  
131 isolates from the largest MGE clusters for long-read sequencing using Oxford Nanopore  
132 technology. Hybrid assembly using short Illumina reads and long Nanopore reads generated  
133 highly contiguous chromosomal and plasmid sequences, which allowed us to resolve larger  
134 elements carrying one or more of the most prevalent MGE clusters (Table 1). We found that  
135 several of the smaller and more prevalent MGEs were carried on a variety of different plasmid  
136 and chromosomal elements, which we designated as “MGE lineages” (Table 1, Fig. 4A). These  
137 smaller MGEs co-occurred in different orders, orientations, and combinations on the larger  
138 elements. This kind of “nesting” of MGEs within larger mobile elements has been previously  
139 observed<sup>6</sup>, and our findings further support the mosaic, mix-and-match nature of the smaller  
140 MGEs we identified. We also confirmed that these MGEs were truly mobile, since they  
141 appeared to be able to move independently between multiple distinct larger mobile elements. A  
142 closer examination of the three largest MGE clusters (C1, C2, C3) showed that C1 sequences  
143 did not all share a common “core” nucleotide sequence, but rather could be aligned in a  
144 pairwise fashion to generate a contiguous sequence (Fig. 4B). MGE clusters C2 and C3, on the  
145 other hand, did contain “core” sequences that were present in all genomes carrying the MGE  
146 (Fig. 4C, 4D).

147

#### 148 **Plasmids carrying MGE clusters are found in multiple sequence types, species, and** 149 **genera circulating in the same hospital**

150 More than half (104/196) of the MGE-carrying genomes in our dataset contained one or more of  
151 the five most prevalent MGEs we identified (C1-C5, Fig. 1B). All five MGEs were small (usually  
152 less than 10kb), and were predicted to be carried on plasmids shared between  
153 *Enterobacteriaceae*. We set out to resolve the genomic context of each of these five MGEs in all  
154 isolates containing them. We used an iterative approach involving long-read sequencing and  
155 hybrid assembly of representative isolates to generate reference sequences of MGE-containing

156 elements (chromosomal or plasmid), followed by mapping of contigs from Illumina-only  
157 assemblies to these reference sequences to assess their coverage in every genome (Methods).  
158 This approach allowed us to query the presence of plasmids and chromosomal elements from  
159 genomes sequenced with Illumina technology alone, without requiring long-read sequencing of  
160 all isolates or relying on external reference sequences. We found that 11 of the 104 isolates (all  
161 *E. coli*) carried cluster C1 and C3 MGEs on their chromosome, while the remaining 93 isolates  
162 carried clustered MGEs on 17 distinct plasmids. Seven of these plasmids were present in only  
163 one isolate in the dataset, but 10 plasmids appeared to be shared between more than one  
164 isolate (Table 1, Fig. 5). We also conducted the same reference-based coverage analysis for all  
165 2,173 genomes in the original dataset, and identified an additional 16 isolates with >90%  
166 coverage of an MGE lineage.

167  
168 While all of the MGEs we originally identified were present in the genomes of bacteria belonging  
169 to different genera, the plasmids that we resolved were variable in how widely they were shared.  
170 For example, some plasmids were only found among isolates belonging to a single species and  
171 multilocus sequence type (ST), suggesting that they were likely transmitted between patients  
172 along with the bacteria that were carrying them (Fig. 5A). These included a *blaKPC-3*  
173 carbapenemase-encoding plasmid (pKLP00149\_2) found in *K. pneumoniae* isolates belonging  
174 to ST258, a multidrug-resistant and highly virulent hospital-adapted bacterial lineage that has  
175 recently undergone clonal expansion in our hospital<sup>18</sup>. We also found a *blaOXA-1* extended  
176 spectrum beta-lactamase-encoding plasmid in *E. coli* isolates belonging to ST131, another  
177 multidrug-resistant and hypervirulent bacterial lineage<sup>25</sup>. In addition to plasmids that occurred in  
178 bacteria belonging to the same ST, we also identified plasmids that were present in isolates  
179 belonging to different STs of the same species, or in different species of the same genus (Fig.  
180 5B). All isolates in this case were *K. pneumoniae* or *K. oxytoca*, suggesting widespread sharing  
181 of plasmids between distinct *Klebsiella* species and STs. The plasmids often carried antibiotic

182 resistance genes, and many also carried metal interaction genes (Table 1). Finally, we identified  
183 three different plasmids that were shared between different bacterial genera all belonging to the  
184 *Enterobacteriaceae* (Fig. 5C). One small plasmid (pKLP00155\_6) carrying the colicin bacterial  
185 toxin was found in 26 isolates belonging to 10 different STs and four different genera. Taken  
186 together, these results indicate that some plasmids carrying putative MGEs were likely inherited  
187 vertically as bacteria were transmitted between patients in the hospital, while others appear to  
188 have transferred independently of bacterial transmission.

189

### 190 **Likely HGT across genera within individual patients**

191 By cross-referencing the isolates containing MGE sequences with de-identified patient data, we  
192 found two instances where identical MGEs were found in pairs of isolates of different genera  
193 that were collected from the same patient, on the same date, and from the same sample source.  
194 To resolve the complete MGE profiles of these cases, we performed long-read sequencing and  
195 hybrid assembly on all genomes involved (Fig. 6). A *K. pneumoniae* ST405 isolate (KLP00215)  
196 and an *E. coli* ST69 isolate (EC00678) collected from a tissue infection from Patient A each  
197 harbored a 113.6kb IncFIB(pQil)/IncFII(K) plasmid carrying *blaKPC*, *blaTEM*, and *blaOXA*  
198 enzymes, as well as a mercury detoxification operon (Fig. 6A, B). In addition, an isolate from a  
199 second patient (Patient B, EC00701, *E. coli* ST131), also encoded a nearly identical plasmid. A  
200 systematic chart review for Patients A and B revealed that they occupied adjacent hospital  
201 rooms for four days during a time period after Patient A's isolates were collected but before  
202 Patient B's isolate was collected. During this time the two patients would have shared the same  
203 healthcare staff, who might have transferred bacteria between them.

204

205 In the second case of putative within-patient HGT, a *K. pneumoniae* ST231 isolate (KLP00187)  
206 and a *C. braakii* ST356 isolate (CB00017) were both collected from the same urine sample of  
207 Patient C (Fig. 6B). Both isolates carried nearly identical 196.8kb IncFIB(K)/IncFII(K) plasmids



208 conferring resistance to aminoglycosides, beta-lactams, chloramphenicol, fluoroquinolones,  
209 sulfonamides, tetracyclines, and trimethoprim, as well as operons encoding copper and arsenic  
210 resistance. In addition, isolates from two subsequent patients (Patient D and Patient E) also  
211 carried plasmids belonging to the same lineage as the plasmid shared between KLP00187 and  
212 CB00017. Alignment of the sequences of all four plasmids showed that the plasmids isolated  
213 from Patient C were nearly identical, while the plasmids from Patients D and E had small  
214 differences in their gene content and organization (Fig. 6B). Systematic chart review did not  
215 identify any strong epidemiologic links between the three patients, suggesting that this plasmid  
216 was not passed directly between these patients and might instead have transferred via  
217 additional bacterial isolates or populations that were not sampled.

218

## 219 **DISCUSSION**

220 In this study, we identified MGEs in a large dataset of whole-genome sequences of clinical  
221 bacterial isolates collected over an 18-month period from a single hospital. We identified,  
222 clustered, and characterized identical sequences found in multiple distinct genera, and in the  
223 process uncovered both expected and unexpected cases of MGE occurrence. We confirmed  
224 that some of the most common MGEs identified were fragments of larger mobile elements. We  
225 performed long-read sequencing to resolve these larger elements, which were almost always  
226 plasmids. When we traced the presence of various plasmid lineages over time, we found some  
227 that were likely transmitted vertically along with the bacteria carrying them, and others that  
228 appeared to be transferred horizontally between unrelated bacteria.

229

230 Our study adds to the body of knowledge of HGT in hospital settings in new and important  
231 ways. We analyzed a large dataset of clinical isolates collected from a single health system, and  
232 used a systematic and unbiased approach to identify MGEs regardless of their type or gene  
233 content. While prior studies have used genomic epidemiology to study how HGT contributes to

234 the transmission, persistence, and virulence of bacterial pathogens<sup>4,5,19,20</sup>, the technical  
235 challenges of resolving MGEs from whole-genome sequencing data have limited the scope of  
236 these findings<sup>16</sup>. Other studies have deliberately tracked HGT in healthcare settings by focusing  
237 either on mobile genes of interest, such as those encoding drug resistance<sup>7,9,14</sup>, or on specific  
238 classes of MGEs<sup>28</sup>. Both of these approaches can generate biased interpretations of the driving  
239 forces behind HGT in clinical settings. For this reason we selected a pairwise alignment-based  
240 approach, whereby we only looked for identical sequences in the genomes of very distantly  
241 related bacteria. In doing so, we did not limit ourselves to only looking for “known” MGEs, and  
242 thus obtained a more accurate and comprehensive overview of the dynamics of HGT between  
243 bacterial genera in our hospital.

244

245 What might cause horizontally-transferred nucleotide sequences to be found at very high  
246 identity within phylogenetically distinct bacteria? We predicted that there might be two possible  
247 causes: Either the sequences we identified represent MGEs that recently underwent HGT and  
248 have not had time to diverge from one another, or they represent genetic elements that are  
249 highly intolerant to mutation. We suspect that our dataset contains both cases. In the two  
250 instances of likely within-patient HGT, both plasmids isolated from the same patient were nearly  
251 identical to one another, suggesting that they were indeed transferred shortly before the  
252 bacteria were isolated. In both cases we also observed similar plasmids in the genomes of  
253 isolates from other patients, but we identified a likely route of transfer between patients only in  
254 the case where the subsequent plasmid was also nearly identical. This finding further supports  
255 the idea that high plasmid identity is evidence of recent transfer. On the other hand, the Tn7  
256 transposon sequence we uncovered that was identical in bacterial isolates from three different  
257 genera was also identical to over two dozen publicly available genome sequences queried  
258 through a standard NCBI BLAST search. The insertion of the Tn7 transposon downstream of

259 *glmS* in all of our isolates suggests TnsD-mediated transposition<sup>29</sup>, but the reason why the  
260 entire transposon sequence is so highly conserved is unclear.

261

262 The vast majority of MGE sequences identified through our approach contained signatures of  
263 mobile elements, and our follow-up work demonstrated that they could very likely move  
264 independently and assemble mosaically on larger mobile elements, such as plasmids,  
265 integrative conjugative elements, and other genomic islands. Antibiotic resistance genes were  
266 present in fewer MGE clusters than we anticipated, given how many resistance genes are  
267 known to be MGE-associated. Our follow-up analysis showed, however, that resistance genes  
268 were indeed highly prevalent among the larger MGEs that we resolved. This suggests that  
269 resistance genes often reside on smaller and more variable elements, which would have been  
270 filtered out by the parameters of our initial screen. A recent study of clinical *K. pneumoniae*  
271 genomes showed that while antibiotic resistance genes were largely maintained at the  
272 population level, they were variably present on different MGEs that fluctuated in their prevalence  
273 over time<sup>24</sup>. Finally, we were somewhat surprised by the large number of metal-interacting  
274 genes and operons within the MGEs that we identified. While metal-interacting genes and  
275 operons have been hypothesized to confer disinfectant tolerance and increased virulence<sup>30,31</sup>,  
276 precisely how these elements might increase bacterial survival in the hospital environment  
277 and/or contribute to infection requires further study.

278

279 Identification of risk factors and common exposures for HGT has previously been  
280 proposed<sup>1,14,18,32</sup>, but the results of prior efforts have been limited because large genomic  
281 datasets from single health systems with corresponding epidemiologic data have not been  
282 widely available<sup>33</sup>. The use of routine whole-genome sequencing for outbreak surveillance in our  
283 hospital has allowed us to begin to study how the transmission of MGEs might be similar or  
284 different from bacterial transmission. In addition to finding evidence of vertical transfer of

285 plasmids accompanying bacterial transmission, we also identified several cases in which the  
286 same MGE lineage was identified in two or more isolates of different sequence types, species,  
287 or genera. In some cases, these isolates were collected within days or weeks of one another.  
288 This finding underscores how rapidly MGEs can move between bacterial populations,  
289 particularly in hospitalized patients<sup>1,21</sup>, and highlights the importance of pairing genome  
290 sequencing with epidemiologic data to uncover routes of MGE transmission.

291  
292 There were several limitations to our study. First, the dataset that we used only contained  
293 genomes of isolates from clinical infections from a pre-selected list of species, and did not  
294 include environmental samples or isolates from patient colonization. Second, our method to  
295 screen for putative MGE sequences based on cross-genus alignment was based on somewhat  
296 arbitrary cutoffs, and we largely ignored MGEs that only transferred between bacteria within a  
297 single genus. Additionally, the cross-genus parameter we employed may have artificially  
298 enriched the number of MGEs we identified among *Enterobacteriaceae*, which are known to  
299 readily undergo HGT with one another<sup>7</sup>. Third, we assigned MGE lineages relative to single  
300 reference sequences and based on our analysis on reference sequence coverage; subsequent  
301 MGEs that either gained additional sequence or rearranged their contents would still be  
302 assigned to the same lineage, even though they may have diverged substantially from the  
303 reference MGE<sup>6</sup>. Finally, this study was based exclusively on comparative genome analyses,  
304 and the MGEs we resolved from clinical isolate genomes were not queried for their capacity to  
305 undergo HGT *in vitro*.

306  
307 In conclusion, we have shown how bacterial whole genome sequence data, which is  
308 increasingly being generated in clinical settings, can be leveraged to study the dynamics of HGT  
309 between drug-resistant bacterial pathogens within a single hospital. Our future work will include  
310 further characterization of the MGEs we resolved, assessment of MGE sharing across closer

311 genetic distances, and incorporation of additional epidemiologic information to identify shared  
312 exposures and possible routes for MGE transfer independent from bacterial transmission.  
313 Ultimately we aim to develop this analysis into a reliable method that can generate actionable  
314 information and enhance traditional approaches to prevent and control multidrug-resistant  
315 bacterial infections.

316

## 317 **METHODS**

### 318 **Isolate collection**

319 Isolates were collected through the Enhanced Detection System for Hospital-Acquired  
320 Transmission (EDS-HAT) project at the University of Pittsburgh<sup>19</sup>. Eligibility of bacterial isolates  
321 for genome sequencing under EDS-HAT required positive clinical culture for high-priority and  
322 multidrug-resistant bacterial pathogens with either of the following criteria: >3 hospital days after  
323 admission, and/or any procedure or prior inpatient stay in the 30 days prior to isolate collection.  
324 Pathogens collected included: *Acinetobacter spp.*, *Burkholderia spp.*, *Citrobacter spp.*,  
325 *Clostridioides difficile*, vancomycin-resistant *Enterococcus spp.*, extended-spectrum beta-  
326 lactamase (ESBL)-producing *E. coli*, ESBL-producing *Klebsiella spp.*, *Proteus spp.*, *Providencia*  
327 *spp.*, *Pseudomonas spp.*, *Serratia spp.*, *Stenotrophomonas spp.*, and methicillin-resistant *S.*  
328 *aureus*. Eligible isolates were identified using TheraDoc software (Version 4.6, Premier, Inc.,  
329 Charlotte, NC). The EDS-HAT project involves no contact with human subjects; the project was  
330 approved by the University of Pittsburgh Institutional Review Board and was classified as being  
331 exempt from informed consent. De-identified patient IDs and culture dates were utilized in  
332 downstream analysis.

333

### 334 **Whole genome sequencing and analysis**

335 Genomic DNA was extracted from pure overnight cultures of single bacterial colonies using a  
336 Qiagen DNeasy Tissue Kit according to manufacturer's instructions (Qiagen, Germantown, MD).

337 Illumina library construction and sequencing were conducted using the Illumina Nextera DNA  
338 Sample Prep Kit with 150bp paired-end reads, and libraries were sequenced on the NextSeq  
339 sequencing platform (Illumina, San Diego, CA). Selected isolates were also sequenced with  
340 long-read technology on a MinION device (Oxford Nanopore Technologies, Oxford, United  
341 Kingdom). Long-read sequencing libraries were prepared and multiplexed using a rapid  
342 multiplex barcoding kit (catalog RBK-004), and were sequenced on R9.4.1 flow cells. Base-  
343 calling on raw reads was performed using Albacore v2.3.3 or Guppy v2.3.1 (Oxford Nanopore  
344 Technologies, Oxford, United Kingdom).

345

346 Illumina sequencing data were processed with Trim Galore v0.6.1 to remove sequencing  
347 adaptors, low-quality bases, and poor-quality reads. Bacterial species were assigned by k-mer  
348 clustering with Kraken v1.0<sup>34</sup> and RefSeq<sup>35</sup> databases. Genomes were assembled with SPAdes  
349 v3.11<sup>36</sup>, and assembly quality was verified using QUAST<sup>37</sup>. Genomes were annotated with  
350 Prokka v1.13<sup>38</sup>. Multi-locus sequence types (STs) were assigned using PubMLST typing  
351 schemes with mlst v2.16.1<sup>39,40</sup>, and ribosomal sequence types (rMLSTs) for isolates not  
352 assigned an ST were approximated by alignment to rMLST reference sequences. Long-read  
353 sequence data was combined with Illumina data for the same isolate, and hybrid assembly was  
354 conducted using Unicycler v0.4.7 or v0.4.8-beta<sup>41</sup>.

355

### 356 **Identification and phylogenetic analysis of putative MGEs**

357 Illumina genome assemblies were screened all-by-all against one another to identify alignments  
358 of at least 5,000bp at 100% identity using nucmer v4.0.0beta2<sup>20</sup>. The nucmer output was filtered  
359 to only include alignments between bacterial isolates of different genera. Nucleotide sequences  
360 from the resulting alignments were then extracted and compared against one another by all-by-  
361 all BLASTn v2.7.1<sup>42</sup>. Results were filtered to only include nucleotide sequences having 100%  
362 identity over at least 5,000bp to at least one sequence from another genus. The resulting

363 comparisons were clustered and visualized using Cytoscape v3.7.1<sup>43</sup>. A phylogeny of MGE-  
364 encoding genomes was constructed using the Genome Taxonomy Database Tool Kit  
365 (GTDBTK)<sup>22</sup>. Briefly, translated amino acid sequences of 120 ubiquitous bacterial genes were  
366 generated, concatenated, and aligned using GTDBTK's *identify* pipeline. The resulting multiple  
367 sequence alignment was masked for gaps and uncertainties, then a phylogenetic tree was  
368 generated using RAxML v8.0.26 with the PROTGAMMA substitution model<sup>44</sup> and 1000  
369 bootstraps.

370

### 371 **Characterization of MGE fragments and assignment of chromosomal element and** 372 **plasmid lineages**

373 The longest nucleotide sequence in each MGE cluster was considered representative of that  
374 cluster, and was annotated with Prokka v1.13. Representative sequences were compared to  
375 publicly available genomes by BLASTn v2.7.1 against the NCBI Nucleotide database. Antibiotic  
376 resistance genes were identified by a BLASTn-based search against the CARD v3.0.1<sup>29</sup> and  
377 ResFinder v3.2<sup>46</sup> databases, and plasmid replicons were identified by a BLASTn-based search  
378 against the PlasmidFinder database v2.0.2<sup>47</sup>. Additional features of each MGE cluster were  
379 identified by consulting annotations assigned by Prokka. MGEs were aligned to one another  
380 using Geneious v11.1.5 (Biomatters Ltd., Auckland, New Zealand) and EasyFig v2.2.2<sup>48</sup>.

381

382 To resolve larger mobile elements encodings MGEs C1-C5, we first selected the earliest isolate  
383 containing each MGE for long-read sequencing and hybrid assembly. The closed, MGE-  
384 encoding element (plasmid or chromosomal) from this earliest isolate was used as a reference  
385 for mapping contigs from Illumina assemblies from all other isolates using BLASTn. Briefly,  
386 contigs from Illumina-only assemblies were aligned to each reference MGE-encoding element,  
387 and isolates having at least 90% coverage of the reference element were assigned to that  
388 element's "lineage." Among isolates having less than 90% coverage, a representative was again

389 selected for long-read sequencing and hybrid assembly, and the process was repeated until all  
390 104 isolates had been assigned to a lineage. Lineages were named based on the MGE-  
391 containing element type (c = chromosomal, p = plasmid), the reference isolate, and the hybrid  
392 assembly contig number, denoted with an underscore at the end of the name. MGE cluster-  
393 containing plasmids resolved through hybrid assembly were also used as reference sequences  
394 to query their presence in the entire 2,173 genome data set using the same BLASTn coverage-  
395 based analysis as above. When isolate genomes showed high coverage of multiple reference  
396 plasmids, the longest plasmid having at least 90% coverage was recorded.

397

### 398 **Systematic chart review to assess epidemiologic links between patients with the same** 399 **plasmids**

400 Patients whose isolates carried the two plasmids found to putatively transfer within individual  
401 patients were reviewed using a systematic approach modified from previously published  
402 methodologies examining patient locations and procedures for potential similarities<sup>49,50</sup>. Patients  
403 were considered infected/colonized with the recovered plasmid on the day of the patients'  
404 culture and all subsequent days. Potential transfer events were considered significant for  
405 locations if an uninfected/uncolonized patient was housed on the same unit location or service  
406 line location (units with shared staff) at the same time or different time as a patient  
407 infected/colonized with the plasmid, using a 60-day window prior to the newly infected/colonized  
408 patient's culture date. Additionally, procedures (e.g. operation room procedures, bedside  
409 invasive procedures) were evaluated for commonalities among all patients 60 days prior to  
410 infection/colonization, as well as potential procedures contaminated by prior infected/colonized  
411 patients that could have transferred to newly infected/colonized patients, again using a 60-day  
412 window prior to the culture date. Procedures were deemed significant if >1 patient had a similar  
413 procedure, or if there was a shared procedure within the 60-day window.

414



415 **Acknowledgements**

416 We gratefully acknowledge Chinelo Ezeonwuka, Kathleen Shutt, Daniel Snyder, Jieshi Chen,  
417 and Hayley Nordstrom for their helpful contributions to this study. This work was supported by a  
418 grant from the Competitive Medical Research Fund of the UPMC Health System to D.V.T., by  
419 NIAID grants R21AI109459 and R01AI127472 to L.H.H., and by the Department of Medicine at  
420 the University of Pittsburgh School of Medicine. The funders had no role in study design, data  
421 collection and interpretation, or the decision to submit the work for publication.

422

423 **REFERENCES**

- 424 1. Lerminiaux, N. A. & Cameron, A. D. S. Horizontal transfer of antibiotic resistance genes in  
425 clinical environments. *Can. J. Microbiol.* **65**, 34–44 (2019).
- 426 2. Juhas, M. Horizontal gene transfer in human pathogens. *Crit. Rev. Microbiol.* **41**, 101–108  
427 (2015).
- 428 3. Jamrozy, D. *et al.* Evolution of mobile genetic element composition in an epidemic  
429 methicillin-resistant *Staphylococcus aureus*: temporal changes correlated with frequent loss  
430 and gain events. *BMC Genomics* **18**, 684 (2017).
- 431 4. Bosch, T. *et al.* Outbreak of NDM-1-Producing *Klebsiella pneumoniae* in a Dutch Hospital,  
432 with Interspecies Transfer of the Resistance Plasmid and Unexpected Occurrence in  
433 Unrelated Health Care Centers. *J. Clin. Microbiol.* **55**, 2380–2390 (2017).
- 434 5. Martin, J. *et al.* Covert dissemination of carbapenemase-producing *Klebsiella pneumoniae*  
435 (KPC) in a successfully controlled outbreak: long- and short-read whole-genome  
436 sequencing demonstrate multiple genetic modes of transmission. *J. Antimicrob. Chemother.*  
437 **72**, 3025–3034 (2017).
- 438 6. Sheppard, A. E. *et al.* Nested Russian Doll-Like Genetic Mobility Drives Rapid  
439 Dissemination of the Carbapenem Resistance Gene blaKPC. *Antimicrob. Agents*  
440 *Chemother.* **60**, 3767–3778 (2016).

- 441 7. Cerqueira, G. C. *et al.* Multi-institute analysis of carbapenem resistance reveals remarkable  
442 diversity, unexplained mechanisms, and limited clonal outbreaks. *Proc. Natl. Acad. Sci. U.*  
443 *S. A.* **114**, 1135–1140 (2017).
- 444 8. Kwong, J. C. *et al.* Translating genomics into practice for real-time surveillance and  
445 response to carbapenemase-producing Enterobacteriaceae: evidence from a complex multi-  
446 institutional KPC outbreak. *PeerJ* **6**, e4210 (2018).
- 447 9. Hazen, T. H. *et al.* Diversity among blaKPC-containing plasmids in Escherichia coli and  
448 other bacterial species isolated from the same patients. *Sci. Rep.* **8**, 10291 (2018).
- 449 10. Schmithausen, R. M. *et al.* The washing machine as a reservoir for transmission of  
450 extended spectrum beta-lactamase (CTX-M-15)-producing Klebsiella oxytoca ST201 in  
451 newborns. *Appl. Environ. Microbiol.* (2019) doi:10.1128/AEM.01435-19.
- 452 11. Stadler, T. *et al.* Transmission of ESBL-producing Enterobacteriaceae and their mobile  
453 genetic elements-identification of sources by whole genome sequencing: study protocol for  
454 an observational study in Switzerland. *BMJ Open* **8**, e021823 (2018).
- 455 12. Ladner, J. T., Grubaugh, N. D., Pybus, O. G. & Andersen, K. G. Precision epidemiology for  
456 infectious disease control. *Nat. Med.* **25**, 206–211 (2019).
- 457 13. Sundermann, A. J. *et al.* Automated data mining of the electronic health record for  
458 investigation of healthcare-associated outbreaks. *Infect. Control Hosp. Epidemiol.* **40**, 314–  
459 319 (2019).
- 460 14. Hardiman, C. A. *et al.* Horizontal Transfer of Carbapenemase-Encoding Plasmids and  
461 Comparison with Hospital Epidemiology Data. *Antimicrob. Agents Chemother.* **60**, 4910–  
462 4919 (2016).
- 463 15. Orlek, A. *et al.* Plasmid Classification in an Era of Whole-Genome Sequencing: Application  
464 in Studies of Antibiotic Resistance Epidemiology. *Front. Microbiol.* **8**, 182 (2017).
- 465 16. Arredondo-Alonso, S., Willems, R. J., van Schaik, W. & Schürch, A. C. On the (im)possibility  
466 of reconstructing plasmids from whole-genome short-read sequencing data. *Microb.*

- 467        *Genomics* **3**, e000128 (2017).
- 468    17. George, S. *et al.* Resolving plasmid structures in Enterobacteriaceae using the MinION  
469        nanopore sequencer: assessment of MinION and MinION/Illumina hybrid data assembly  
470        approaches. *Microb. Genomics* **3**, e000118 (2017).
- 471    18. Conlan, S. *et al.* Single-molecule sequencing to track plasmid diversity of hospital-  
472        associated carbapenemase-producing Enterobacteriaceae. *Sci. Transl. Med.* **6**, 254ra126  
473        (2014).
- 474    19. Sundermann, A. J. *et al.* Outbreak of Vancomycin-resistant *Enterococcus faecium* in  
475        Interventional Radiology: Detection Through Whole Genome Sequencing-Based  
476        Surveillance. *Clin. Infect. Dis. Off. Publ. Infect. Dis. Soc. Am.* (2019) doi:10.1093/cid/ciz666.
- 477    20. Marçais, G. *et al.* MUMmer4: A fast and versatile genome alignment system. *PLoS Comput.*  
478        *Biol.* **14**, e1005944 (2018).
- 479    21. Huddleston, J. R. Horizontal gene transfer in the human gastrointestinal tract: potential  
480        spread of antibiotic resistance genes. *Infect. Drug Resist.* **7**, 167–176 (2014).
- 481    22. Parks, D. H. *et al.* A standardized bacterial taxonomy based on genome phylogeny  
482        substantially revises the tree of life. *Nat. Biotechnol.* **36**, 996–1004 (2018).
- 483    23. Marsh, J. W. *et al.* *Clostridioides difficile*: a potential source of NpmA in the clinical  
484        environment. *J. Antimicrob. Chemother.* **74**, 521–523 (2019).
- 485    24. Komano, T., Fujitani, S., Funayama, N., Kanno, A. & Sakuma, K. Physical and genetic  
486        analyses of IncI2 plasmid R721: evidence for the presence of shufflon. *Plasmid* **23**, 248–  
487        251 (1990).
- 488    25. Manges, A. R. *et al.* Global Extraintestinal Pathogenic *Escherichia coli* (ExPEC) Lineages.  
489        *Clin. Microbiol. Rev.* **32**, (2019).
- 490    26. Valenzuela, J. K. *et al.* Horizontal gene transfer in a polyclonal outbreak of carbapenem-  
491        resistant *Acinetobacter baumannii*. *J. Clin. Microbiol.* **45**, 453–460 (2007).
- 492    27. Schweizer, C. *et al.* Plasmid-Mediated Transmission of KPC-2 Carbapenemase in

- 493 Enterobacteriaceae in Critically Ill Patients. *Front. Microbiol.* **10**, 276 (2019).
- 494 28. Savinova, T. A., Bocharova, Y. A., Lazareva, A. V., Chebotar, I. V. & Mayanskiy, N. A.  
495 [Integron diversity in blavim-2-carrying carbapenem-resistant clinical *Pseudomonas*  
496 *aeruginosa* isolates.]. *Klin. Lab. Diagn.* **64**, 497–502 (2019).
- 497 29. Parks, A. R. & Peters, J. E. Tn7 elements: engendering diversity from chromosomes to  
498 episomes. *Plasmid* **61**, 1–14 (2009).
- 499 30. McDonnell, G. & Russell, A. D. Antiseptics and disinfectants: activity, action, and resistance.  
500 *Clin. Microbiol. Rev.* **12**, 147–179 (1999).
- 501 31. Chandrangsu, P., Rensing, C. & Helmann, J. D. Metal homeostasis and resistance in  
502 bacteria. *Nat. Rev. Microbiol.* **15**, 338–350 (2017).
- 503 32. Pecora, N. D. *et al.* Genomically Informed Surveillance for Carbapenem-Resistant  
504 Enterobacteriaceae in a Health Care System. *mBio* **6**, e01030 (2015).
- 505 33. Struelens, M. J. The epidemiology of antimicrobial resistance in hospital acquired infections:  
506 problems and possible solutions. *BMJ* **317**, 652–654 (1998).
- 507 34. Wood, D. E. & Salzberg, S. L. Kraken: ultrafast metagenomic sequence classification using  
508 exact alignments. *Genome Biol.* **15**, R46 (2014).
- 509 35. Pruitt, K. D., Tatusova, T. & Maglott, D. R. NCBI reference sequences (RefSeq): a curated  
510 non-redundant sequence database of genomes, transcripts and proteins. *Nucleic Acids*  
511 *Res.* **35**, D61-65 (2007).
- 512 36. Bankevich, A. *et al.* SPAdes: a new genome assembly algorithm and its applications to  
513 single-cell sequencing. *J. Comput. Biol. J. Comput. Mol. Cell Biol.* **19**, 455–477 (2012).
- 514 37. Gurevich, A., Saveliev, V., Vyahhi, N. & Tesler, G. QUAST: quality assessment tool for  
515 genome assemblies. *Bioinforma. Oxf. Engl.* **29**, 1072–1075 (2013).
- 516 38. Seemann, T. Prokka: rapid prokaryotic genome annotation. *Bioinforma. Oxf. Engl.* **30**,  
517 2068–2069 (2014).
- 518 39. Jolley, K. A. & Maiden, M. C. J. BIGSdb: Scalable analysis of bacterial genome variation at

- 519 the population level. *BMC Bioinformatics* **11**, 595 (2010).
- 520 40. Seemann, T. *mlst*. (Github).
- 521 41. Wick, R. R., Judd, L. M., Gorrie, C. L. & Holt, K. E. Unicycler: Resolving bacterial genome  
522 assemblies from short and long sequencing reads. *PLoS Comput. Biol.* **13**, e1005595  
523 (2017).
- 524 42. Altschul, S. F., Gish, W., Miller, W., Myers, E. W. & Lipman, D. J. Basic local alignment  
525 search tool. *J. Mol. Biol.* **215**, 403–410 (1990).
- 526 43. Shannon, P. *et al.* Cytoscape: a software environment for integrated models of biomolecular  
527 interaction networks. *Genome Res.* **13**, 2498–2504 (2003).
- 528 44. Stamatakis, A. RAxML version 8: a tool for phylogenetic analysis and post-analysis of large  
529 phylogenies. *Bioinforma. Oxf. Engl.* **30**, 1312–1313 (2014).
- 530 45. Jia, B. *et al.* CARD 2017: expansion and model-centric curation of the comprehensive  
531 antibiotic resistance database. *Nucleic Acids Res.* **45**, D566–D573 (2017).
- 532 46. Zankari, E. *et al.* Identification of acquired antimicrobial resistance genes. *J. Antimicrob.*  
533 *Chemother.* **67**, 2640–2644 (2012).
- 534 47. Carattoli, A. *et al.* In silico detection and typing of plasmids using PlasmidFinder and  
535 plasmid multilocus sequence typing. *Antimicrob. Agents Chemother.* **58**, 3895–3903 (2014).
- 536 48. Sullivan, M. J., Petty, N. K. & Beatson, S. A. Easyfig: a genome comparison visualizer.  
537 *Bioinforma. Oxf. Engl.* **27**, 1009–1010 (2011).
- 538 49. Eyre, D. W. *et al.* Diverse sources of *C. difficile* infection identified on whole-genome  
539 sequencing. *N. Engl. J. Med.* **369**, 1195–1205 (2013).
- 540 50. Ward, D. V. *et al.* Integration of genomic and clinical data augments surveillance of  
541 healthcare-acquired infections. *Infect. Control Hosp. Epidemiol.* **40**, 649–655 (2019).

542 **Table 1.** MGE-encoding lineages and associated antibiotic resistance and metal interaction

543 gene contents.

| MGE Lineage <sup>a</sup> | Length (kb) | Replicons (PlasmidFinder)                 | Antibiotic Resistance (ResFinder)                                                                                                     | Metal Interaction (Prokka)                                    |
|--------------------------|-------------|-------------------------------------------|---------------------------------------------------------------------------------------------------------------------------------------|---------------------------------------------------------------|
| cEC00609                 | 39          | None                                      | <i>aac(3)-IIa, aac(6')-Ib-cr, blaCTX-M-1, blaOXA-1, catB3, tet(A)</i>                                                                 | None                                                          |
| pCB00017_2               | 196.8       | IncFIB(K), IncFII(K)                      | <i>aac(6')-Ib-cr, aph(3'')-Ib, aph(6)-Id, blaCTX-M-15, blaOXA-1, blaTEM-1B, catB3, qnrB1, tet(A), sul2</i>                            | <i>copD</i> operon, <i>pcoE, silE, silP, ars</i> operon       |
| pCB00028_2               | 383.1       | IncHI2, IncHI2A, repA                     | <i>aac(3)-IIa, aac(6')-Ib-cr, aadA1, aph(3'')-Ib, aph(6)-Id, blaCTX-M-15, blaOXA-1, blaTEM-1B, catA1, catB3, dfrA14, sul2, tet(A)</i> | <i>pcoE, merR, merB</i>                                       |
| pEC00668_2               | 145.4       | IncFIA, IncFIB(AP001918), IncFII(pRSB107) | <i>aac(6)-Id, aph(3'')-Ib, dfrA14, blaTEM-1B, mph(A), sul2</i>                                                                        | <i>efeU, merA, merC, merP, merR, merT</i>                     |
| pEC00690_2               | 106.8       | IncFIA, IncFII                            | <i>aac(6')-Ibcr, blaOXA-1, catB3, tet(A)</i>                                                                                          | <i>efeU</i>                                                   |
| pKLP00149_2              | 165.2       | FII(pBK30683)                             | <i>aac(6')-Ib, aac(6')-Ib-cr, aadA1, aph(3'')-Ib, aph(6)-Id, blaKPC-3, blaOXA-9, blaSHV-182, blaTEM-1A, dfrA14, sul2</i>              | <i>csoR</i>                                                   |
| pKLP00155_6              | 9.5         | ColRNAI                                   | None                                                                                                                                  | None                                                          |
| pKLP00161_2              | 236.5       | IncFIB(K), IncFII(K)                      | <i>aac(6')-Ib-cr, aph(3'')-Ib, aph(6)-Id, blaCTX-M-15, blaOXA-1, blaTEM-1B, dfrA14, qnrB1, sul2, tet(A)</i>                           | <i>copD</i> operon, <i>pcoC, pcoE, silE, silP, ars</i> operon |
| pKLP00177_3              | 170.8       | IncFIB(K)                                 | <i>aac(3)-IIa, aac(6')-Ib-cr, aph(3'')-Ib, aph(6)-Id, blaCTX-M-15, blaOXA-1, blaTEM-1B, catB3, dfrA14, qnrB1, sul2, tet(A)</i>        | <i>copD</i> operon, <i>pcoC, pcoE, silE, silP, ars</i> operon |
| pKLP00182_3              | 15.8        | None                                      | <i>aac(6')-Ib-cr, blaOXA-1, catB3, dfrA14, tet(A)</i>                                                                                 | None                                                          |
| pKLP00215_4              | 113.6       | IncFIB(pQil), IncFII(K)                   | <i>blaKPC-2, blaOXA-9, blaTEM-1A</i>                                                                                                  | <i>merB, merR</i>                                             |
| pKLP00218_2              | 164.7       | IncFIB(K), IncFII(K)                      | <i>aph(3'')-Ib, aph(6)-Id, blaCTX-M-15, blaTEM-1B, dfrA14, sul2</i>                                                                   | <i>copD</i> operon, <i>pcoC, pcoE, silE, silP, ars</i> operon |
| pKLP00221_2              | 242.3       | ColRNAI, IncFIB(K), IncFII(K)             | <i>aac(6')-Ib, aada2, aph(3')-1a, blaKPC-2, blaOXA-9, blaTEM-1A, catA1, dfrA12, mph(A), sul1</i>                                      | <i>copD</i> operon, <i>pcoC, pcoE, silE, silP, ars</i> operon |
| pKLO00017_2              | 226.2       | IncFIB(K), IncFII(K)                      | <i>aph(3'')-Ib, aph(6)-Id, blaCTX-M-15, blaTEM-1B, dfrA14, sul2</i>                                                                   | <i>copD</i> operon, <i>pcoC, pcoE, silE, silP, ars</i> operon |

544 <sup>a</sup>MGE lineage names include location (c = chromosome, p = plasmid), name of the reference

545 isolate sequenced, and assembly contig number (\_2, \_3, \_4, \_6).

546 **Figure Legends**

547 **Figure 1.** Identical mobile genetic elements (MGEs) shared across bacterial genera in a single  
548 hospital. (A) Approach to identify and characterize MGEs. (B) MGEs identified by the approach  
549 shown in (A). 51 MGE clusters found in distinct genera visualized with Cytoscape. Nodes  
550 represent bacterial isolates and are color-coded by genus. Edges connect nodes from different  
551 genera sharing >5kb of sequence at 100% nucleotide sequence identity. Clusters examined  
552 more closely in subsequent figures are labeled. (C) Genus distribution of all 2,173 genomes in  
553 the dataset (left) and the 196 isolates with MGEs shared across genera (right). (D) Prevalence  
554 of annotated mobile element, antimicrobial resistance (AMR) and metal-interacting genes  
555 among 51 MGE clusters. (E) Summary of AMR genes identified in MGE clusters. Genes are  
556 grouped by antibiotic class and bubble sizes correspond to prevalence among the MGE clusters  
557 shown in (B). AMR gene names are listed inside each bubble.

558 **Figure 2.** Phylogenetic distribution of MGE clusters across 196 genomes. Black squares mark  
559 the presence of one or more MGE clusters in each genome, with each column corresponding to  
560 a different MGE cluster. The heat map to the right shows MGE cluster density (i.e. total number  
561 of cross-genus MGEs) in each bacterial genome. Clusters examined more closely in  
562 subsequent figures are labeled and shaded in gray.

563 **Figure 3.** Examples of MGE sharing across genera. (A) Genes shared between a vancomycin-  
564 resistant *E. faecium* (VRE) plasmid and a *C. difficile* chromosome (MGE cluster C9). The VanA  
565 operon, conferring vancomycin resistance, is marked with an orange bar. Shared drug  
566 resistance genes are colored magenta, and mobile element genes are colored blue. Gray  
567 shading marks a stretch of DNA sequence that is 100% identical between isolates. (B) Identical  
568 portions of an integrated conjugative element (MGE cluster C30) shared between an *S.*  
569 *marcescens* genome (SER00094) and two *P. aeruginosa* genomes (PSA00048 and  
570 PSA00656). Blue = *intS* integrase; green = formaldehyde resistance genes; gray = UvrABC  
571 system genes. Type IV secretion machinery is marked with an orange bar, and gray shading

572 marks sequences that are 100% identical between isolates. (C) Identical Tn7 transposons  
573 shared between *A. baumannii*, *E. coli*, and *P. mirabilis* (MGE cluster C17). The Tn7 sequence of  
574 the pR721 plasmid is shown at the top. The *tnsABCDE* transposon machinery is marked with an  
575 orange bar, and the *glmS* gene, which flanks the Tn7 insertion site, is colored red. Shared drug  
576 resistance genes are colored magenta, and an *xerH* tyrosine recombinase is colored blue. Gray  
577 shading marks sequences that are 100% identical between isolates.

578 **Figure 4.** Mosaicism of MGE clusters present on diverse elements. (A) Circular plot of six  
579 distinct sequence elements (black bars) that encode MGE clusters C1, C2, and C3. Lowercase  
580 letters in sequence names indicate element type (c = chromosome, p = plasmid). Homologous  
581 cluster sequences are connected to one another with colored links (purple = C1, orange = C2,  
582 green = C3, gray = other). Inner circle depicts MGE genes involved in MGE mobilization (blue),  
583 antibiotic resistance (red) and metal interaction (gray). (B-D) Alignments of sequences grouped  
584 into MGE clusters C1 (B), C2 (C), and C3 (D) from the larger MGEs displayed in (A). ORFs are  
585 colored by function (blue = mobilization, red = antibiotic resistance, green = other/hypothetical).  
586 Antibiotic resistance genes are labeled above and dark gray blocks connect sequences that are  
587 identical over at least 5kb.

588 **Figure 5:** Timelines of plasmid lineage occurrence among isolates of the same ST (A), same  
589 genus (B), or different genera (C). Timelines show the culture date of isolates predicted to  
590 encode plasmids belonging to the same lineage, based on coverage mapping to reference  
591 plasmids listed to the left of each timeline. The MGE clusters carried by each plasmid are listed  
592 in parentheses below the plasmid name. More information about each plasmid is provided in  
593 Table 1. Shape and color of data points correspond to bacterial species and ST, respectively.

594 **Figure 6:** Cross-genus transfer of plasmids within and between patients. (A) Schematic diagram  
595 showing *K. pneumoniae* and *E. coli* isolates bearing the same plasmid sampled from two  
596 patients. (B) Nucleotide alignment of the plasmid presumably transferred within and between  
597 the patients shown in (A). A 113.6kb IncFIB(pQil)/IncFII(K) carbapenemase-encoding plasmid



598 was resolved from two genomes of different bacterial isolates from the same clinical specimen  
599 from Patient A. A nearly identical plasmid was also identified in an isolate from Patient B, who  
600 occupied a hospital room adjacent to Patient A. (C) Alignment of a 196.8kb IncFIB(K)/IncFII(K)  
601 multidrug-resistance plasmid resolved from two genomes of different bacterial isolates from the  
602 same clinical specimen from Patient C. Similar plasmids were also found in isolates from two  
603 additional patients (Patient D and Patient E), who had no identifiable epidemiologic links with  
604 Patient C. ORFs are colored by function (blue = mobilization, red = antibiotic resistance, gray =  
605 metal-interacting, green = other/hypothetical). Antibiotic resistance genes, metal-interacting  
606 operons, and Type IV secretion components are labeled. Shading between sequences indicates  
607 regions >5kb with >99.9% identity, and pairwise identities across the entire plasmid are noted to  
608 the right.

Fig. 1

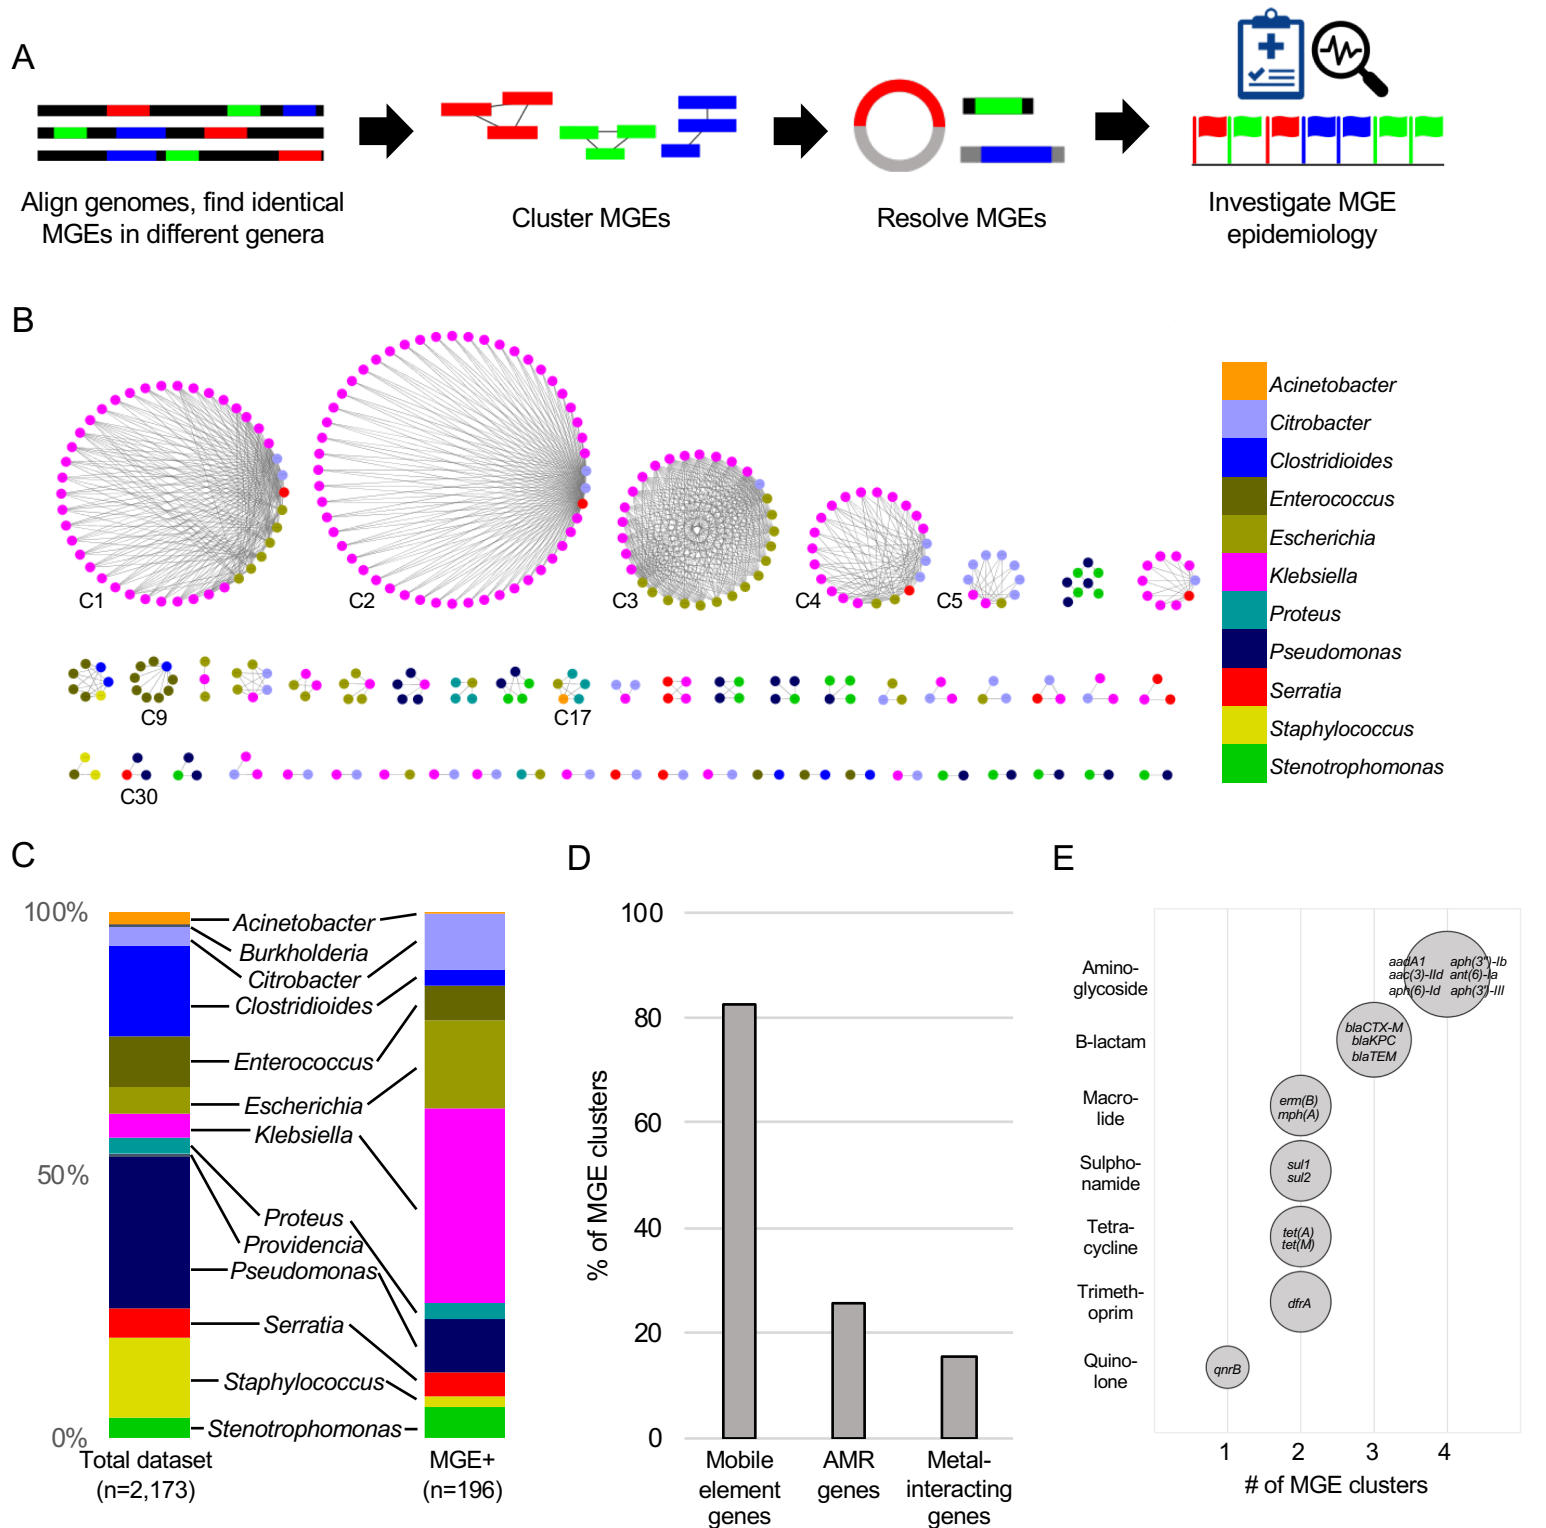

**Figure 1.** Identical mobile genetic elements (MGEs) shared across bacterial genera in a single hospital. (A) Approach to identify and characterize MGEs. (B) MGEs identified by the approach shown in (A). 51 MGE clusters found in distinct genera visualized with Cytoscape. Nodes represent bacterial isolates and are color-coded by genus. Edges connect nodes from different genera sharing >5kb of sequence at 100% nucleotide sequence identity. Clusters examined more closely in subsequent figures are labeled. (C) Genus distribution of all 2,173 genomes in the dataset (left) and the 196 isolates with MGEs shared across genera (right). (D) Prevalence of annotated mobile element, antimicrobial resistance (AMR) and metal-interacting genes among 51 MGE clusters. (E) Summary of AMR genes identified in MGE clusters. Genes are grouped by antibiotic class and bubble sizes correspond to prevalence among the MGE clusters shown in (B). AMR gene names are listed inside each bubble.

Fig. 2

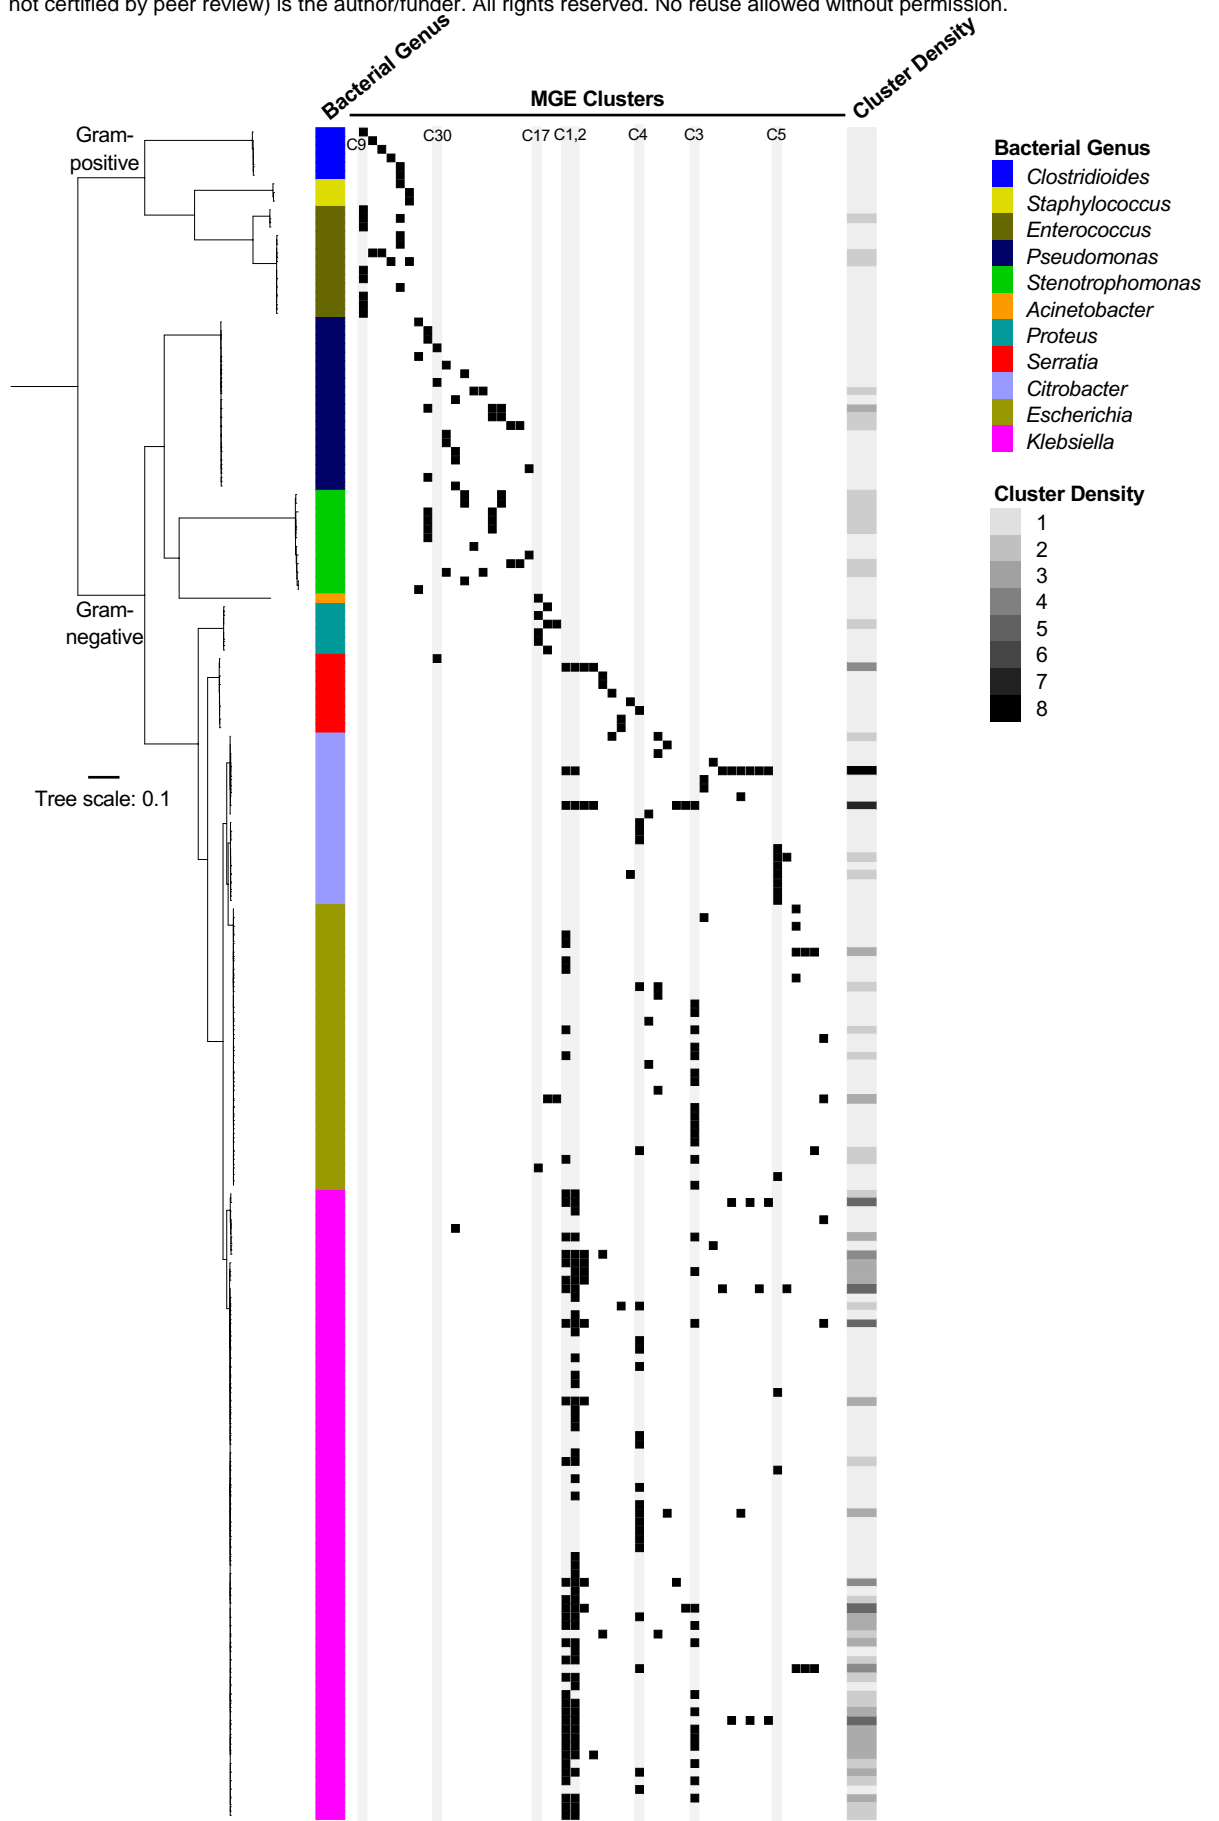

**Figure 2.** Phylogenetic distribution of MGE clusters across 196 genomes. Black squares mark the presence of one or more MGE clusters in each genome, with each column corresponding to a different MGE cluster. The heatmap to the right shows MGE cluster density (i.e. total number of cross-genus MGEs) in each bacterial genome. Clusters examined more closely in subsequent figures are labeled and shaded in gray.

Fig. 3

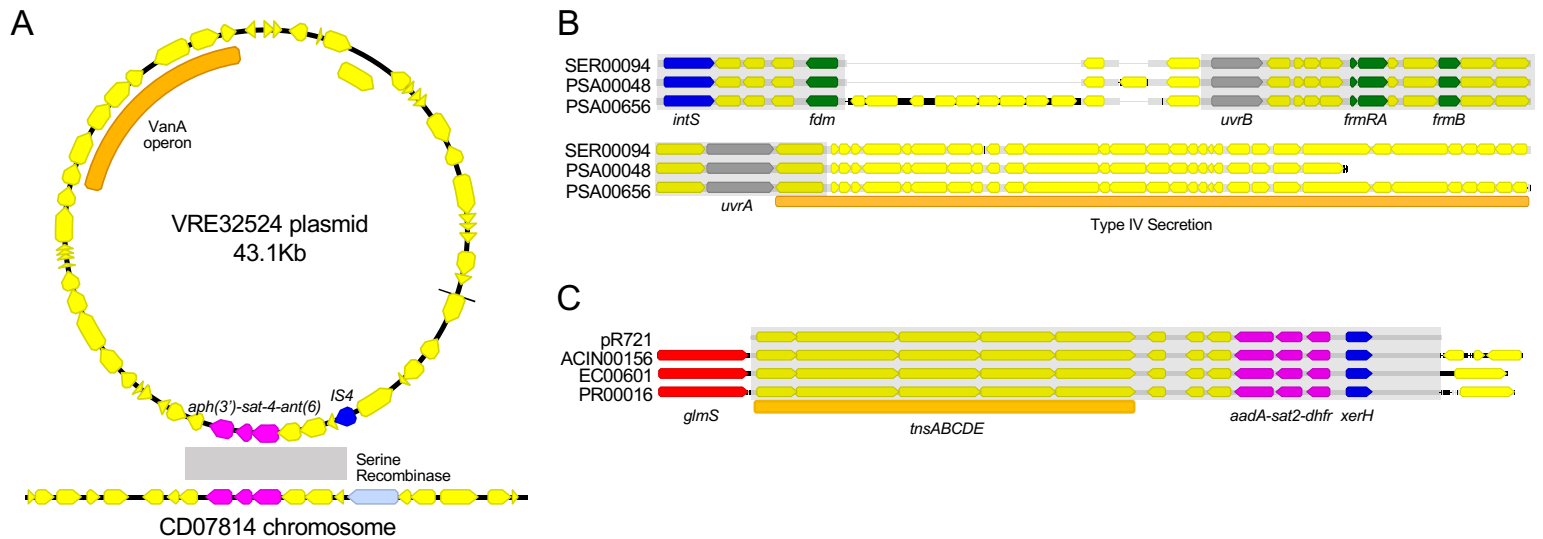

**Figure 3.** Examples of MGE sharing across genera. (A) Genes shared between a vancomycin-resistant *E. faecium* (VRE) plasmid and a *C. difficile* chromosome (MGE cluster C9). The VanA operon, conferring vancomycin resistance, is marked with an orange bar. Shared drug resistance genes are colored magenta, and mobile element genes are colored blue. Gray shading marks a stretch of DNA sequence that is 100% identical between isolates. (B) Identical portions of an integrated conjugative element (MGE cluster C30) shared between an *S. marcescens* genome (SER00094) and two *P. aeruginosa* genomes (PSA00048 and PSA00656). Blue = *intS* integrase; green = formaldehyde resistance genes; gray = UvrABC system genes. Type IV secretion machinery is marked with an orange bar, and gray shading marks sequences that are 100% identical between isolates. (C) Identical Tn7 transposons shared between *A. baumannii*, *E. coli*, and *P. mirabilis* (MGE cluster C17). The Tn7 sequence of the pR721 plasmid is shown at the top. The *tnsABCDE* transposon machinery is marked with an orange bar, and the *glmS* gene, which flanks the Tn7 insertion site, is colored red. Shared drug resistance genes are colored magenta, and an *xerH* tyrosine recombinase is colored blue. Gray shading marks sequences that are 100% identical between isolates.

Fig. 4

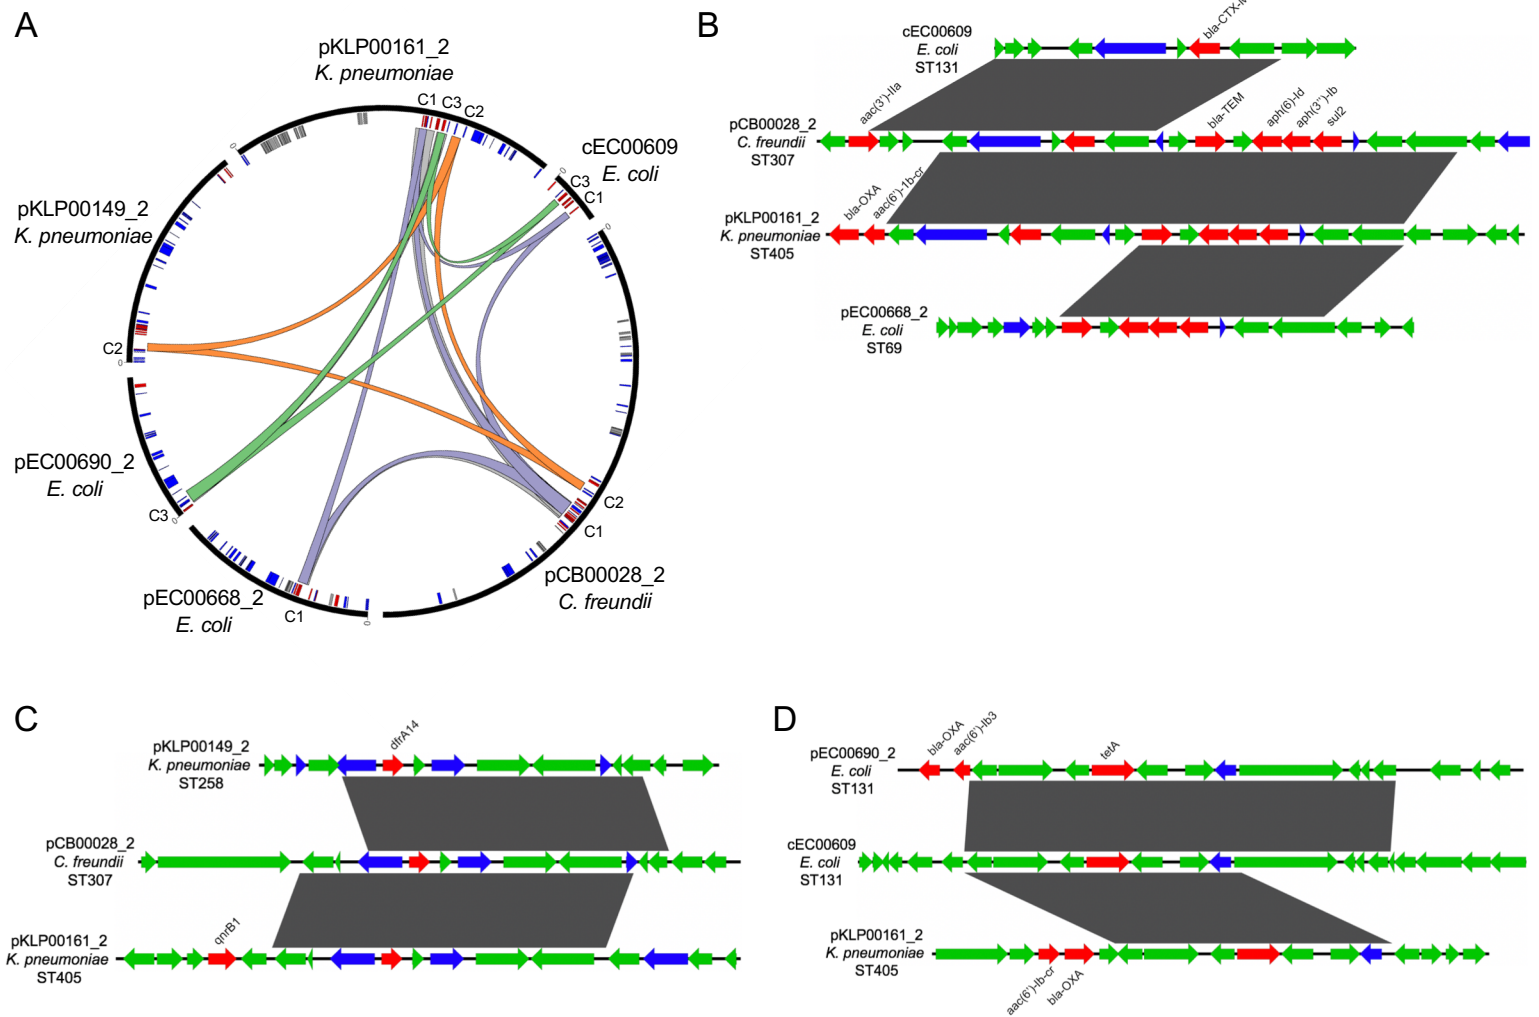

**Figure 4.** Mosaicism of MGE clusters present on diverse elements. (A) Circular plot of six distinct sequence elements (black bars) that encode MGE clusters C1, C2, and C3. Lowercase letters in sequence names indicate element type (c = chromosome, p = plasmid). Homologous cluster sequences are connected to one another with colored links (purple = C1, orange = C2, green = C3, gray = other). Inner circle depicts MGE genes involved in MGE mobilization (blue), antibiotic resistance (red) and metal interaction (gray). (B-D) Alignments of sequences grouped into MGE clusters C1 (B), C2 (C), and C3 (D) from the larger MGEs displayed in (A). ORFs are colored by function (blue = mobilization, red = antibiotic resistance, green = other/hypothetical). Antibiotic resistance genes are labeled above and dark gray blocks connect sequences that are identical over at least 5kb.

Fig. 5

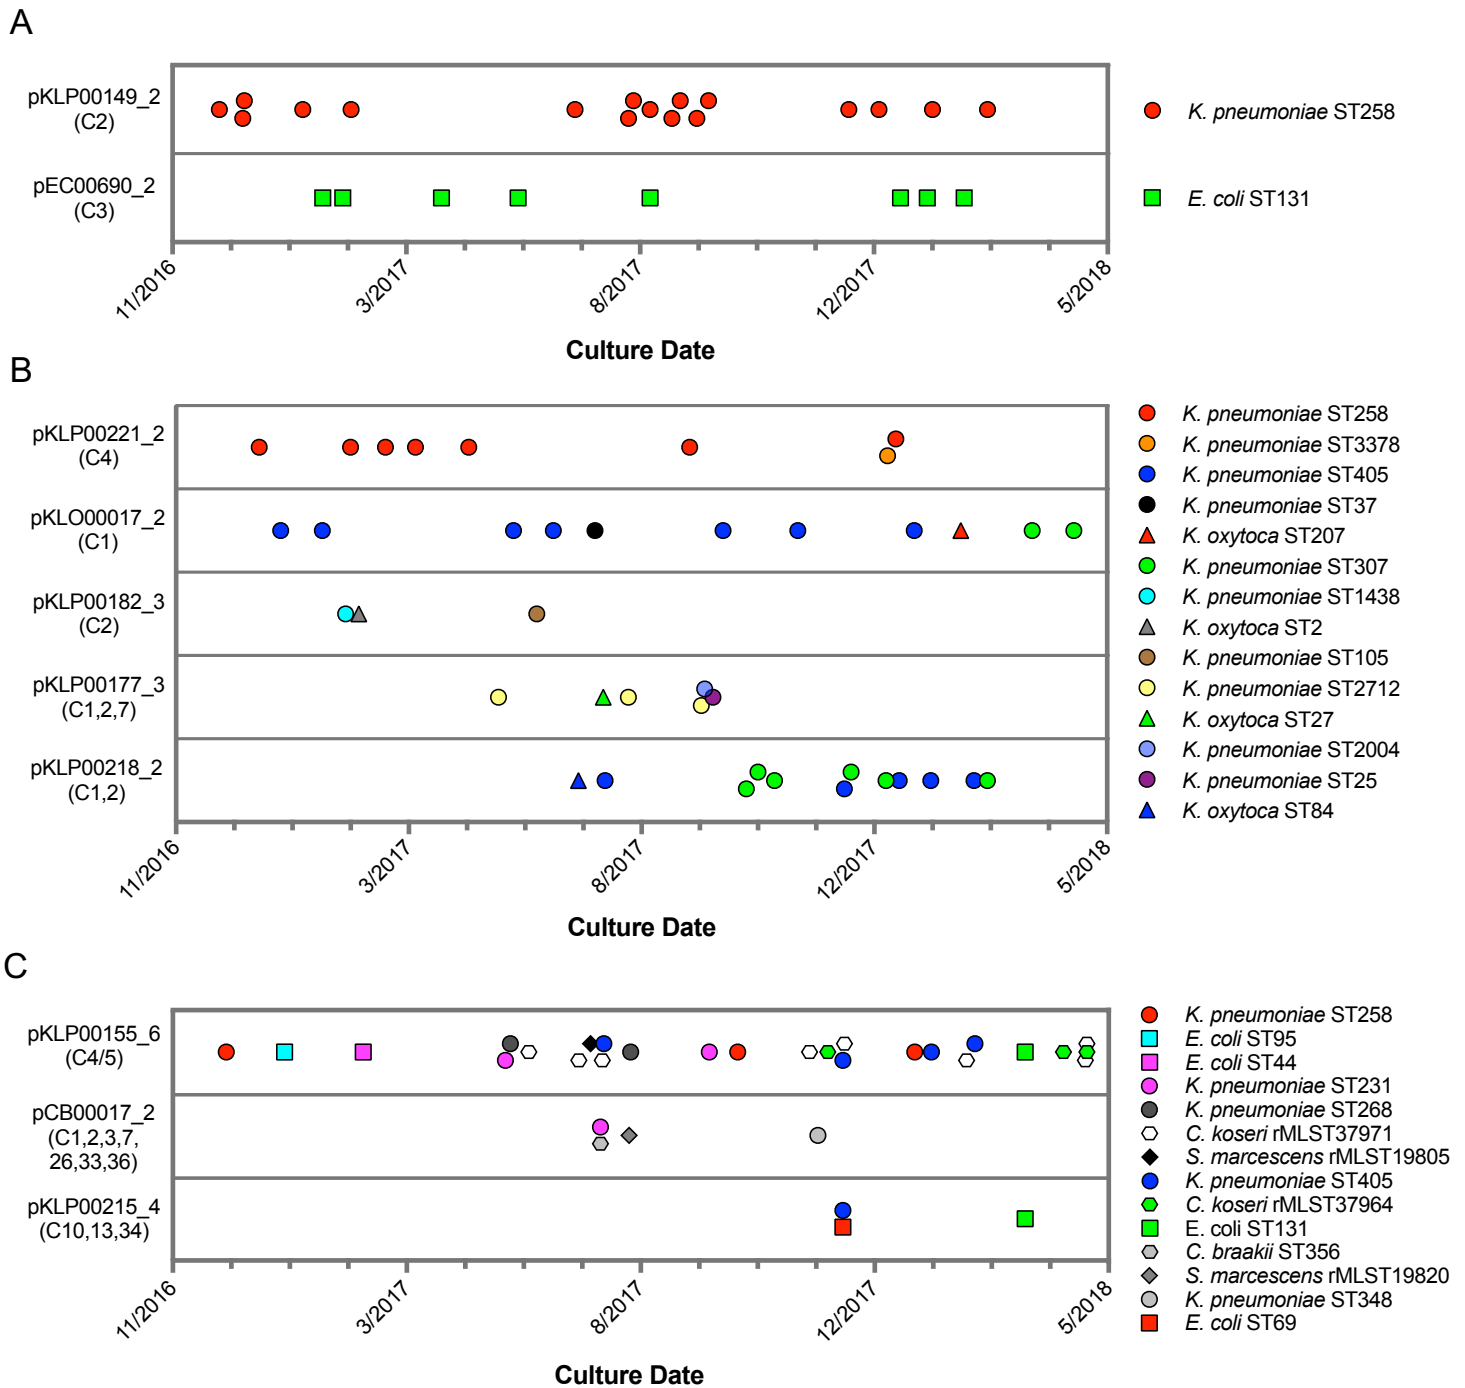

Fig. 6

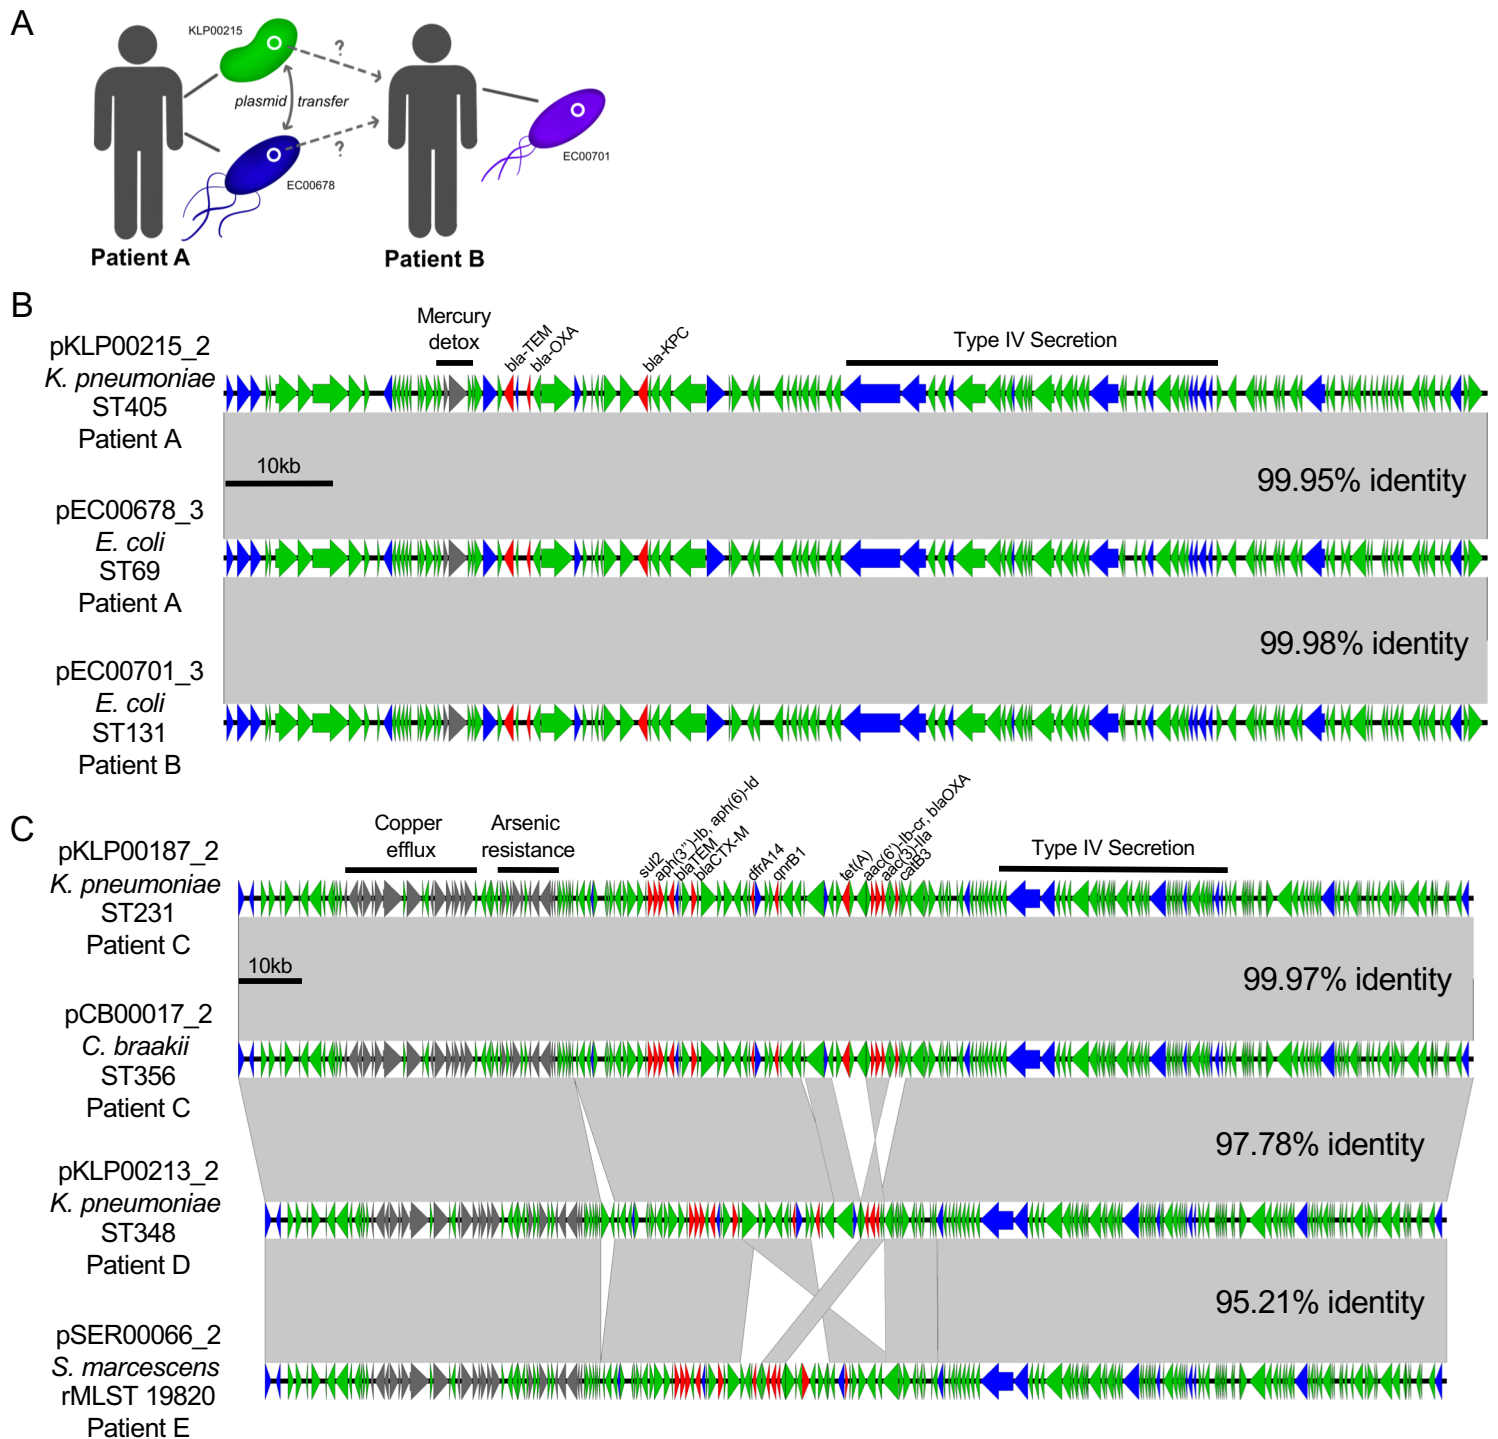

**Figure 6:** Cross-genus transfer of plasmids within and between patients. (A) Schematic diagram showing *K. pneumoniae* and *E. coli* isolates bearing the same plasmid sampled from two patients. (B) Nucleotide alignment of the plasmid presumably transferred within and between the patients shown in (A). A 113.6kb *IncFIB(pQil)/IncFII(K)* carbapenemase-encoding plasmid was resolved from two genomes of different bacterial isolates from the same clinical specimen from Patient A. A nearly identical plasmid was also identified in an isolate from Patient B, who occupied a hospital room adjacent to Patient A. (C) Alignment of a 196.8kb *IncFIB(K)/IncFII(K)* multidrug-resistance plasmid resolved from two genomes of different bacterial isolates from the same clinical specimen from Patient C. Similar plasmids were also found in isolates from two additional patients (Patient D and Patient E), who had no identifiable epidemiologic links with Patient C. ORFs are colored by function (blue = mobilization, red = antibiotic resistance, gray = metal-interacting, green = other/hypothetical). Antibiotic resistance genes, metal-interacting operons, and Type IV secretion components are labeled. Shading between sequences indicates regions >5kb with >99.9% identity, and pairwise identities across the entire plasmid are noted to the right.
